# Supplementary material for: Annotating Human P-Glycoprotein Bioassay Data
Source: PubMed Central journal article supplement (PMC3531886; doi:10.1002/minf.201200059), 2012-08-07
Supplement: minf0031-0599-sd1.pdf [file minf0031-0599-sd1.pdf]

# molecular informatics

models – molecules – systems

## Supporting Information

© Copyright Wiley-VCH Verlag GmbH & Co. KGaA, 69451 Weinheim, 2012

## Supporting Information.

Table S1.

Regression statistics of correlation plots (Figures 3-8).

| <b>Regression statistics</b>                   |               |               |               |               |               |               |
|------------------------------------------------|---------------|---------------|---------------|---------------|---------------|---------------|
| <b>Confidence level = 95%</b>                  | <b>Fig. 3</b> | <b>Fig. 4</b> | <b>Fig. 5</b> | <b>Fig. 6</b> | <b>Fig. 7</b> | <b>Fig. 8</b> |
| Correlation Coefficient (R)                    | 0.748         | 0.879         | 0.855         | 0.791         | 0.855         | 0.847         |
| Coefficient of Determination (R <sup>2</sup> ) | 0.560         | 0.772         | 0.732         | 0.626         | 0.731         | 0.717         |
| Adjusted R <sup>2</sup>                        | 0.530         | 0.762         | 0.719         | 0.609         | 0.721         | 0.669         |
| Standard Error                                 | 0.427         | 0.295         | 0.316         | 0.372         | 0.519         | 0.253         |
| Observations                                   | 17            | 24            | 24            | 24            | 28            | 8             |

Table S2.

Cell lines used for bioassays determining bioactivities of compounds interacting with human P-glycoprotein in ChEMBL and TP-search.

| <b>Cell line</b>                   | <b>Description</b>                                                                        | <b>Species</b> |
|------------------------------------|-------------------------------------------------------------------------------------------|----------------|
| AML-2/D100                         | daunorubicin-resistant acute myelogenous leukemia cell line                               | human          |
| BHK                                | baby hamster kidney cell line                                                             | hamster        |
| Caco-2                             | human epithelial colorectal adenocarcinoma cells                                          | human          |
| CCRF/VCR1000                       | human T lymphoblastoid cell line                                                          | human          |
| CEM                                | human leukemic cell line                                                                  | human          |
| CEM/VLB100                         | vinblastine-resistant T-lymphoblastic leukaemic cell line                                 | human          |
| HCT15/CL02                         | doxorubicin-resistant subline from parental HCT15 human adenocarcinoma colon cancer cells | human          |
| HCT-8                              | human colon cancer cell line                                                              | human          |
| HEK                                | human embryonic kidney 293 cell line                                                      | human          |
| HL60/Vinc                          | vincristine-resistant HL60 human promyelocytic leukaemia cell line                        | human          |
| HL60R                              | multi-drug resistant human promyelocytic leukemia cell line                               | human          |
| K562/Adr                           | adriamycin-resistant human erythroleukemia cell line                                      | human          |
| KB/MDR                             | human nasopharyngeal carcinoma KB cell line                                               | human          |
| KB-V1                              | multidrug-resistant cervical cancer cell line                                             | human          |
| L5178Y                             | murine lymphoblastic cell lines                                                           | mouse          |
| LLC-PK1                            | pig kidney epithelial cells                                                               | pig            |
| L-MDR1                             | polarized LLC-PK1 epithelial cells transfected with MDR1                                  | human          |
| MDA435/LCC6/MDR1                   | P-gp overexpressing human breast cancer cell line                                         | human          |
| MDCK                               | Madin-Darby canine kidney cell line                                                       | dog            |
| MDCK2                              | cell line derived from MDCK                                                               | dog            |
| MDR-CEM                            | multi-drug resistant (MDR) variant of the CEM human T lymphoblastoid cell line            | human          |
| MDR-P388                           | multi-drug resistant subline of murine monocytic leukemia P388 cell line                  | mouse          |
| MES-SA/DX5                         | multi-drug resistant human uterine sarcoma cell line                                      | human          |
| MRP1-transfected HeLa-T5 cell line | mutidrug resistant human cervical cancer cell line                                        | human          |
| NIH-3T3-G185                       | MDR1 transfected mouse embryo fibroblast cell line                                        | mouse          |
| P388/VMDRC.04                      | multi-drug resistant subline of P388 murine leukemia cells                                | mouse          |
| PBCEC                              | porcine brain capillary endothelial cell line                                             | pig            |

File S1.: "QSAR\_dataset\_198cpds.sdf"

sdf file of 199 chemical compounds with chemical structures and bioactivity values included measured in a daunorubicin efflux assay in MDR CCRF vcr1000 cells.

File S2.: "Classification\_dataset\_203cpds.sdf"

sdf file of 203 chemical compounds being either classified as inhibitors or non-inhibitors of human P-glycoprotein with chemical structures included.
